# Supplementary material for: Genome of the Single Human Chromosome 18 as a “Gold Standard” for Its Transcriptome
Source: Front Genet. 2021 Jun 14;12:674534. doi: 10.3389/fgene.2021.674534 (PMC8238407; doi:10.3389/fgene.2021.674534)
Supplement: Supplementary file 1 [file Table_1.XLSX]

## Sheet: Лист1
Uniprot AC	Illumina2020_HepG2_RPKM	PCR_HepG2, (copies per cell)	ONT_HepG2	HepG2_17_Illumina17 (RPKM)
Q6ZTR6	nd	0.706983	nd	nd
A0PJZ0	nd	0.660284	0	0.24301
Q96N68	nd	0.0965925	0	nd
Q86UQ5	nd	0.00212703	0	nd
Q8IYD9	nd	1.72448	0.507454	0.621592
Q7Z4B0	nd	0.00332698	0	nd
Q9BZP3	nd	0.00663093	0	nd
Q96FQ7	nd	13.7147	0.55024	nd
O43776	nd	12.2929	33.5351	59.3843
Q9HC47	nd	nd	nd	nd
A8MTL9	nd	nd	0	nd
J3KSC0	nd	nd	0	nd
P18621	1616.5	40.9691	3855.09	83.683
P02766	995.5	48.8899	278.725	466.342
P19404	533	29.6662	5.91031	106.997
P25705	365	323.977	120.334	227.542
P19105	288.5	0.641398	321.074	68.0123
O14950	286	0.151111	314.807	120.241
Q9BY50	163	44.3334	0	83.1532
Q969U7	147	22.4939	58.2429	19.3645
Q96CS2	78	2.95853	13.8052	10.9244
P62314	57	14.8405	12.6608	44.7748
Q9Y5U9	48.5	18.4471	17.4764	21.853
P49257	48.5	85.08	27.1829	47.9673
O75351	46	14.5783	3.7665	7.26274
P42765	45	18.5697	2.04207	47.8609
P17028	44.5	11.5477	3.77756	8.50287
P17706	42.5	2.74697	5.67883	13.4198
P00167	33	8.00179	168.62	95.2708
P83876	32.5	0.804444	2.90908	49.6673
Q14126	30	79.6345	4.9267	21.4021
Q6PI98	26.5	8.77043	11.5021	12.061
Q96FV9	24.5	6.634	0	9.60598
Q15532	24	34.3316	2.55382	12.053
Q96PU5	23.5	68.0087	12.4769	23.6739
Q15583	23.5	9.00991	49.6257	13.2764
Q9P0L0	22	13.7641	16.1953	9.29506
O15118	21	62.0975	6.3641	26.2877
P19022	20	18.1985	7.59121	22.3943
Q8WU67	19.5	6.15244	0.525497	12.7129
Q96P16	19	75.9229	10.4221	11.9768
Q10472	18.5	4.73587	13.4278	15.1379
Q7LBR1	18	24.1597	11.8949	10.4289
Q96EE3	18	22.5418	4.83103	14.9768
Q32NC0	17.5	2.28603	15.9997	6.84613
P04818	17.5	4.9811	43.5109	66.9145
O43148	16.5	7.56783	2.38615	8.25162
Q9BVV7	16	38.3897	1.89352	10.6961
Q9Y4W6	15.5	128.575	9.84815	28.2474
Q6UB98	15	11.2963	0.40365	1.31111
P07947	14.5	24.9462	6.60536	14.0432
Q06136	14	1.64095	0.548441	3.2571
O14730	12.5	14.274	1.58697	6.77885
Q96BD8	12	7.7337	2.60205	4.75037
Q96KP4	10.5	152.192	10.6783	17.1761
Q7RTS9	10.5	12.1668	8.21529	17.7671
Q9BUF5	10.5	2.99955	1.7463	15.3287
P54578	10.5	16.5106	2.39239	11.8649
Q92539	10	47.2766	4.93725	19.9271
Q9H939	10	1.04195	0	0.824741
O14544	10	1.68749	4.39187	8.40917
Q68CL5	10	89.5578	12.9958	5.10071
Q6IQ32	9.5	45.9708	2.55209	10.3263
Q13433	9.5	11.9824	5.02053	11.47
Q99747	9	11.5105	4.97014	5.05805
Q8NF99	9	2.33778	0.178581	2.90089
Q15555	8.5	173.014	7.61818	15.5787
Q8WVD3	8.5	10.1781	4.74125	3.73727
Q13464	8.5	10.709	0	7.80984
Q5U5Q3	8	37.0516	2.75784	14.4845
Q8TF05	8	6.75203	2.45264	7.71702
Q99708	8	6.2087	1.89184	5.81152
Q5KU26	7.5	0.0973874	0	0.0832111
O95948	7.5	49.7899	0.276412	3.28827
O43396	7.5	2.44163	22.152	32.3627
Q5FWF5	7	28.7704	1.03766	4.52136
Q9BYG4	7	6.89466	3.57606	4.50478
C9JCN9	6.5	1.10222	6.94147	22.0795
Q9H0R4	6.5	12.8574	6.71609	9.78447
Q9UDY8	6.5	36.1205	2.85487	9.46339
Q9UBB5	6.5	2.8665	5.60426	9.5591
O14777	6.5	10.3607	5.71991	10.8702
Q15311	6.5	20.9464	4.98832	18.8801
Q15796	6.5	8.21006	4.81012	1.97209
Q6PKX4	6	14.9881	0.914192	6.08273
Q6IA86	6	0.126734	3.23987	8.07244
Q96EN8	6	26.9888	3.61917	13.3961
O95427	6	5.2625	0	3.24915
Q9Y4J8	5.5	0.411932	2.07293	0.761114
Q7L5Y1	5.5	7.46593	5.31923	7.00421
Q53F39	5.5	4.14866	0.947666	1.45432
Q96EQ8	5	2.67346	0.168048	0.457845
Q96JJ7	5	29.9555	0.797406	2.33679
Q9GZX9	5	18.8704	1.27776	3.14361
Q8TDN4	4.5	9.61916	10.836	11.1857
P23368	4.5	13.4967	0.108516	4.87539
Q6IQ22	4.5	15.4342	1.41915	11.5341
Q9Y2L5	4.5	10.743	0	5.04704
Q86YT6	4	33.4822	2.78182	7.11883
Q9H5I5	4	49.1714	1.82466	12.6833
A6NHR9	4	26.2284	2.23387	9.53981
Q9C0B9	4	23.3063	1.42164	12.1506
Q96ND0	3.5	5.88889	4.42967	4.22247
O14732	3.5	7.2094	0	36.9451
Q9Y5X9	3.5	11.0773	0	1.07684
O60346	3.5	17.3618	2.07036	11.5075
Q8NEB9	3.5	1.76021	0.113765	9.21497
Q13485	3.5	15.9948	1.84287	5.96671
Q6ZSZ6	3.5	31.5926	0	5.32019
Q96B23	3	8.48991	1.59905	2.83786
P38405	3	0.271111	0.459744	0.898458
Q9P2X3	3	7.40906	0.513452	1.55529
Q8NA19	3	3.18842	1.62819	4.37246
Q08AE8	3	7.45079	1.01592	4.4209
Q8N584	3	10.0759	3.35928	1.54886
Q15849	3	nd	0	0.197155
Q9P2G3	2.5	116.376	1.11224	15.1448
Q9P0U4	2.5	0.285414	0	16.1701
Q02487	2.5	6.8	0.294202	3.77026
Q9ULV0	2.5	22.8871	4.93134	6.86595
Q13794	2.5	2.21805	1.0532	1.16974
Q96DM3	2.5	10.6731	0	4.22091
Q8N2U9	2.5	7.52093	5.93059	21.2273
Q8N4Q0	2.5	22.6417	1.83617	5.69749
O43829	2.5	3.39763	0	2.42273
Q8N1N2	2.5	nd	0	0.217376
Q8TCD1	2	3.25778	12.9798	3.12882
Q9UIS9	2	24.1028	2.47256	4.57451
Q8N3J2	2	2.55117	0	2.35487
Q9UNA4	2	5.64923	0	1.17756
P28827	2	21.9307	0	10.8964
Q8N0V3	2	1.4752	11.4033	4.75038
Q92750	2	4.14866	0.641815	1.16477
Q8TAI1	2	0.965073	55.5056	16.573
Q92618	2	58.1179	0.849154	11.905
Q8J025	1.5	0.94262	0	0.225194
Q9UBX8	1.5	8.30298	0.903727	1.21881
Q6UXH8	1.5	0.00703685	0	0.198777
Q8TEP8	1.5	31.8373	0	3.96103
Q8TAP6	1.5	3.95509	2.7758	1.28796
P02686	1.5	2.41637	1.21945	1.88109
O75928	1.5	10.1228	0.533877	2.28238
Q9BYG7	1.5	nd	0	0.166205
Q68D86	1	0.0823424	0	0.269626
Q86TB3	1	0.016193	0.24894	0.884659
Q9H2F9	1	3.30135	0.475267	1.00692
Q9Y5B0	1	14.0188	0	3.52
Q9H777	1	0.413362	0	1.08155
Q9BXX0	1	0.00632872	0	2.5638
Q9HCE0	1	15.9739	0.143852	1.92765
P22830	1	0.0932885	0.607721	2.73663
Q9H706	1	8.59973	0	0.161628
Q92908	1	3.41932	3.50662	6.30046
Q9H3N8	1	0.0111877	0	0.218337
Q719H9	1	7.04458	0.559356	3.65509
O15165	1	0.117635	0.228324	1.20495
Q6ZSG1	1	0.0129268	0	nd
Q86VV8	1	1.16938	0	2.48872
O15105	1	5.67776	3.42547	5.52492
O15466	1	0.0595046	0	0.0403156
Q9Y6Q6	1	5.20281	0.113266	1.58955
Q9Y4E6	1	5.67944	0.256947	1.34859
Q9UL36	1	1.29278	0.113611	2.34196
Q9C0G0	1	5.27014	0.116209	1.92833
Q9HCE3	1	0.0281734	0	nd
Q86W11	1	2.77197	0	1.85518
Q96KN2	1	nd	0	nd
O43520	0.5	1.62504	0	0.31312
O43861	0.5	2.1517	0	4.05977
Q9ULB5	0.5	0.0151362	0	nd
O43310	0.5	27.8527	1.40448	9.50854
Q08554	0.5	0.0376592	0	0.10534
Q14574	0.5	0.0876194	0	0.16292
P32926	0.5	0.000811227	0	0.0955981
Q86T90	0.5	0.633929	0	0.870928
Q9Y4B5	0.5	1.8632	0.630556	2.81596
Q9P260	0.5	0.226667	0.150901	4.82706
A6NNZ2	0.5	0.288889	0	nd
Q86VQ3	0.5	0.0608547	0	nd
Q8TB69	0.5	3.04889	0	0.205488
Q96KH6	0.5	nd	0	nd
Q8N6D5	0	0.0228116	0	nd
Q9BXX2	0	0.0364584	0	nd
Q5BJE1	0	0.00501041	0	nd
B2RU33	0	0.00622222	0	nd
A6NKL6	0	0.0830283	0	0.062019
A6NC57	0	0.00520118	0	0.121218
Q3SY17	0	0.00977778	0	nd
Q3B7S5	0	0.000418721	0	nd
Q24JQ0	0	2.50451	0	2.54614
A6NLF2	0	0.016	0	nd
P18509	0	0.00599625	0	nd
P0CW23	0	0.10071	0	nd
P55087	0	0.030617	0	0.0260895
Q9P2N2	0	0.0326545	0	nd
Q9C0F0	0	0.00625089	0	nd
P10415	0	0.132104	0	0.0202062
Q8IYS8	0	0.0385648	0	nd
O75952	0	0.210025	0	0.0429671
Q8IUK8	0	0.00494748	0	nd
Q15762	0	0.0432065	0	0.0748333
Q9HBT6	0	0.00207328	0	nd
Q9BZC1	0	0.109428	0	0.0562152
Q12798	0	0.00219969	0	nd
Q96M91	0	0.0655958	0	0.120743
Q7L1S5	0	4.23251	0.160771	1.11658
Q15846	0	0.00377095	0	0.131672
Q7Z7G2	0	0.00538867	0	nd
P43146	0	0.0301126	0	nd
O14490	0	0.008	0	0.0662302
Q8IZU8	0	0.0311111	0	0.0965145
Q02413	0	0.00683612	0	nd
Q86SJ6	0	0.00805237	0	nd
Q8IYF1	0	0.00218848	0	nd
Q8NG57	0	0.0146667	0	nd
A0A087WX78	0	0.0805771	0	nd
Q9Y2J2	0	0.0117636	0	nd
Q8NCQ5	0	0.00533333	0	0.0329051
Q2V2M9	0	0.00451292	0	0.0692678
P47211	0	0.0014559	0.091341	nd
Q9C091	0	0.0870674	0	0.0958741
Q9UJ96	0	2.39683	0	0.244883
P25391	0	0.233144	0	0.194463
Q16787	0	0.162077	0	0.200574
Q01718	0	0.00311111	0	0.187092
P33032	0	0.00539609	0	nd
Q16820	0	0.0106667	0	nd
P52179	0	0.213333	0	0.539809
O95644	0	0.0411242	0	0.068037
O94818	0	0.00739046	0	nd
Q9BXW6	0	0.00379718	0	nd
Q96N28	0	0.742222	1.24695	5.74952
Q8TAA3	0	0.00114864	0	nd
O00194	0	0.00900002	0	nd
Q13636	0	0.507148	0	0.0722388
Q9Y2V3	0	0.0342235	0	nd
Q8N8N0	0	0.0386312	0	nd
Q9BXA9	0	0.0016807	0	nd
Q96P63	0	0.00851888	0	nd
P05120	0	0.0195556	0	nd
P29508	0	0.00533333	0	nd
P36952	0	0.00108161	0	nd
O75635	0	0.0215417	0	nd
P50452	0	0.378245	0.304006	0.143579
Q9Y6X0	0	6.81989	0.092618	0.17903
Q6ZMC9	0	0.0651427	0	nd
Q2VWA4	0	0.0060177	0	nd
P0C7Q5	0	0.333333	0	nd
O43173	0	0.111111	0	0.0103057
Q9H2B2	0	0.00159319	0	nd
A1YPR0	0	0.131258	0	0.149155
Q96N95	0	0.00488889	0	0.0411861
Q96K83	0	0.0283261	0	nd
Q68DL7	0	nd	0	nd
Q0P6D2	0	nd	0	0.120914
Q3SY89	0	nd	0	nd
A6NM36	0	nd	0	nd
Q9H159	0	nd	0	nd
O60543	0	nd	0	nd
Q96RT6	0	nd	0	nd
P07492	0	nd	0	nd
P0C7T4	0	nd	0	nd
Q8IYT4	0	nd	0	0.136252
Q8IVV2	0	nd	0	nd
P31152	0	nd	0	nd
P32245	0	nd	0	nd
Q8TDF5	0	nd	0	nd
Q99578	0	nd	0	nd
P48595	0	nd	0	nd
Q96P15	0	nd	0	nd
Q9UIV8	0	nd	0	nd
P48594	0	nd	0	nd
Q13336	0	nd	0	0.0321796
P59095	0	ND	0	nd
P15884	0	ND	0	0.0334026
